# Supplementary material for: Deep sequencing identifies circulating mouse miRNAs that are functionally implicated in manifestations of aging and responsive to calorie restriction
Source: Aging (Albany NY). 2013 Feb 28;5(2):130–41. doi: 10.18632/aging.100540 (PMC3616200; doi:10.18632/aging.100540)
Supplement: Supplementary file 1 [file aging-05-130-s001.xlsx]

## Sheet: Supplemental Table 1
Supplemental Table 1. Novel circulating miRNAs predicted by miRDeep2.
Novel miRNA Id1	Genomic location2	MiRDeep2 score3	Probability4	Total5	Mature6	Star7	Consensus mature sequence	Consensus star sequence	Consensus precursor sequence
chr4_10456	chr4:156230058..156230115:-	53	0.85 ± 0.07	103	96	7	accaccuuccucacccacgcu	ugugggcguggcggugcug	ugugggcguggcggugcuggagcugcucaacuucccaccaccuuccucacccacgcu
chr6_13898	chr6:113707212..113707267:+	39	0.85 ± 0.07	76	74	2	uuagagacagcagaagggcca	ugucccuuuguuuucucucagg	uuagagacagcagaagggccacuaauuagcuguugucccuuuguuuucucucagg
chr4_9154	chr4:4780195..4780260:-	34	0.85 ± 0.07	65	64	1	acuuucuagauguucccggaag	cugggaacaucuacaaagugaa	cugggaacaucuacaaagugaaguagaaagaaugcaagagcucacuuucuagauguucccggaag
chr9_21342	chr9:122981877..122981936:+	33	0.85 ± 0.07	58	53	5	uagguagaccaggcugaucu	auccuccugucucugccuucu	uagguagaccaggcugaucuagccacgaacucacagagauccuccugucucugccuucu
chr1_1107	chr1:164217678..164217741:+	31	0.85 ± 0.07	60	55	5	uuucugacucagccaccugaga	uauggguggcuggucucagaagaga	uauggguggcuggucucagaagagaccccauuuguaucacuuuucugacucagccaccugaga
chr13_30637	chr13:44444343..44444400:-	20	0.85 ± 0.07	37	36	1	uaaguagccuaggaaccuggcc	ccagguuccuaggcuauuuag	uaaguagccuaggaaccuggccaguaauuuuauaggccagguuccuaggcuauuuag
chr10_24066	chr10:80669404..80669461:-	16	0.85 ± 0.07	31	30	1	uagcucucccuggccugcac	ggcagggcuaggagcuggcugg	ggcagggcuaggagcuggcuggucuguggaggugaccuagcucucccuggccugcac
chr16_34751	chr16:23111300..23111361:+	15	0.85 ± 0.07	30	26	4	guugucguucccccugcucaga	uaagcaggauuuaacuacaauau	uaagcaggauuuaacuacaauauagcugcucagugcuguguugucguucccccugcucaga
chr3_6365	chr3:90270154..90270213:+	15	0.85 ± 0.07	28	23	5	ugaccuguggcuccucucccag	aaggagaggaguuggcagggacu	aaggagaggaguuggcagggacuagcuaugagcauccugaccuguggcuccucucccag
chr8_18825	chr8:105660298..105660358:+	13	0.85 ± 0.07	25	22	3	ucagccguucagcaccguccagac	acugggcaaggaacaggcu	acugggcaaggaacaggcucgggauacagaauguccucagccguucagcaccguccagac
chr12_27838	chr12:33262824..33262884:+	11	0.85 ± 0.07	20	19	1	ucagaacaaccugaccugccu	ccagcacugaguuguucuguca	ucagaacaaccugaccugccucuuuaaucugccaggagccagcacugaguuguucuguca
chr7_17831	chr7:132777970..132778029:-	11	0.85 ± 0.07	22	21	1	ucuuagcuguucucugcccca	gagagagaagcagcuaagguu	ucuuagcuguucucugccccagcacuguaggcacaugggagagagaagcagcuaagguu
chr11_26098	chr11:118002279..118002345:+	7.8	0.85 ± 0.06	14	13	1	uggcggcagucaggauaccugu	agguguuuccucugccgucac	uggcggcagucaggauaccugucuuuccugguaggaaugaguuacagguguuuccucugccgucac
chr4_8812	chr4:134129689..134129748:+	6.9	0.87 ± 0.05	12	11	1	cuggcggcgguugcucucugc	cagagacuaaucugucgccacc	cuggcggcgguugcucucugcaacacaggagugugggcagagacuaaucugucgccacc
chr5_12913	chr5:137531454..137531494:-	5.7	0.88 ± 0.04	80	80	0	gggggccggggguggggu	cccacccuacaggucucugc	gggggccggggguggggucacccacccuacaggucucugc
chr6_14522	chr6:49059690..49059740:-	5.1	0.88 ± 0.04	724	724	0	ugaggggcagagagggagaca	ccucccuguccucuccaucauu	ccucccuguccucuccaucauuugacagaugaggggcagagagggagaca
chr13_30944	chr13:82571108..82571167:-	5	0.88 ± 0.04	11	11	0	ucugcccuacuuugaacuccc	gagugcaaacuagggcagcca	gagugcaaacuagggcagccauuauggaaaucagcaugucugcccuacuuugaacuccc
chr7_16447	chr7:139543303..139543361:+	5	0.88 ± 0.04	15	15	0	ucugcccuucccucuggagagu	ccuccggcagcuugaggcacagcagu	ccuccggcagcuugaggcacagcagucagauguggcucugcccuucccucuggagagu
chr4_8580	chr4:116997030..116997099:+	4.9	0.83 ± 0.05	12	12	0	gugagugggcucugggcauga	gugccuagagacucauucagau	gugagugggcucugggcaugacaggguggaugagccaugugcugcgggugccuagagacucauucagau
chr5_10910	chr5:66317068..66317118:+	4.8	0.83 ± 0.05	120	120	0	ccugcuggauaauggcug	gccaagguuacaggga	ccugcuggauaauggcuggcaggaagcauacugugccaagguuacaggga
chr1_36	chr1:9623199..9623286:+	4.7	0.83 ± 0.05	13	13	0	gggaacucaucagggcaaga	uugcucagucugcuu	gggaacucaucagggcaagaagcuggaggcaagagcuggugcagagagcacagaggggugcugcuuaguggcuugcucagucugcuu
chr10_23248	chr10:94107235..94107301:+	4.7	0.83 ± 0.05	11	10	1	cgucugccuuccucugcuccug	acaaggggaagugcugacacgc	cgucugccuuccucugcuccuggcugagauuauuaauuuacaggacaaggggaagugcugacacgc
chr4_9736	chr4:108201497..108201553:-	4.2	0.83 ± 0.05	107	107	0	uccuguacugagcugcacau	guguaugcuugugac	guguaugcuugugacaucagcaccuucuugcuuuguuccuguacugagcugcacau
1A unique identification containing the chromosome and an arbitrary number.
2 Location of the miRNA precursor in the mm10 mouse genome.
3The miRDeep2 score represents the log-odds probability of a sequence being genuine miRNA precursor versus the probability that it is a background hairpin, given the evidence from the data.
4The estimated probability that a predicted novel miRNA with a score of this or higher is a true positive.
5The sum of read counts that map to the predicted mature, loop and star miRNAs. The number of reads that map to the predicted miRNA loop is zero for all listed novel miRNAs.
6The number of reads that map to the predicted mature miRNA.
7The number of reads that map to the predicted star miRNA.
