# Supplementary material for: Deep sequencing identifies circulating mouse miRNAs that are functionally implicated in manifestations of aging and responsive to calorie restriction
Source: Aging (Albany NY). 2013 Feb 28;5(2):130–41. doi: 10.18632/aging.100540 (PMC3616200; doi:10.18632/aging.100540)
Supplement: Supplementary file 3 [file aging-05-130-s003.docx]

**Supplementary Table 3**. miRNAs whose serum abundance does not significantly change with age, but is significantly changed by CR1.

| **miRNA** | **Young (cpm)2** | **Old (cpm)2** | **CR (cpm)2** | **Age FC3** | **Age p-value** | **CR FC3** | **CR p-value** |
| --- | --- | --- | --- | --- | --- | --- | --- |
| mmu-miR-27b-3p | 4626 | 6960 | 1859 | 1.5 | 3.4E-01 | -3.7 | 3.7E-02 |
| mmu-miR-194-5p | 31 | 91 | 23 | 2.9 | 9.0E-02 | -3.9 | 3.2E-02 |
| mmu-miR-322-3p | 27 | 84 | 21 | 3.2 | 7.1E-02 | -4.0 | 2.9E-02 |
| mmu-miR-148a-3p | 1340 | 3359 | 813 | 2.5 | 1.7E-01 | -4.1 | 1.3E-02 |
| mmu-miR-100-5p | 40 | 64 | 14 | 1.6 | 5.4E-01 | -4.6 | 1.1E-02 |
| mmu-miR-34a-5p | 5 | 12 | 2 | 2.3 | 5.3E-01 | -4.8 | 4.2E-02 |
| mmu-miR-139-5p | 50 | 93 | 19 | 1.9 | 9.9E-01 | -4.8 | 5.8E-03 |
| mmu-miR-29c-3p | 75 | 186 | 37 | 2.5 | 2.6E-01 | -5.1 | 2.9E-03 |
| mmu-miR-152-3p | 28 | 75 | 15 | 2.6 | 2.2E-01 | -5.1 | 2.5E-03 |
| mmu-miR-126-5p | 1897 | 4120 | 647 | 2.2 | 6.1E-01 | -6.4 | 2.1E-04 |
| mmu-miR-335-5p | 6 | 21 | 2 | 3.2 | 1.1E-01 | -8.4 | 7.1E-05 |
| mmu-miR-411-5p | 11 | 18 | 2 | 1.6 | 6.2E-01 | -9.8 | 1.1E-02 |
| mmu-miR-434-5p | 14 | 40 | 3 | 2.9 | 3.9E-01 | -14.5 | 2.5E-04 |
| mmu-miR-127-3p | 227 | 593 | 38 | 2.6 | 5.1E-01 | -15.6 | 4.8E-05 |
| mmu-miR-381-3p | 12 | 34 | 2 | 2.8 | 4.4E-01 | -22.8 | 9.2E-06 |
| mmu-miR-541-5p | 44 | 172 | 7 | 3.9 | 1.2E-01 | -23.5 | 6.1E-06 |
| mmu-miR-540-3p | 2 | 12 | 0 | 5.4 | 6.1E-02 | -32.7 | 4.9E-05 |
| mmu-miR-136-3p | 23 | 82 | 2 | 3.6 | 1.8E-01 | -38.4 | 9.2E-08 |
| mmu-miR-486-3p | 877 | 704 | 1115 | -1.2 | 2.5E-03 | 1.6 | 3.3E-07 |
| mmu-miR-3107-3p | 520 | 418 | 649 | -1.2 | 3.2E-03 | 1.6 | 7.4E-07 |

1Changes were considered significant if the fold change ≥ 1.5 and the p-value < 0.05.

2Average miRNA read count for the indicated experimental group reported as counts per million (cpm) reads in the sequenced library.

3Fold change calculated by EdgeR from pairwise comparisons between the young and old control groups for the age effect, or between the old control and old CR groups for the CR effect.
