# Supplementary material for: Deep sequencing identifies circulating mouse miRNAs that are functionally implicated in manifestations of aging and responsive to calorie restriction
Source: Aging (Albany NY). 2013 Feb 28;5(2):130–41. doi: 10.18632/aging.100540 (PMC3616200; doi:10.18632/aging.100540)
Supplement: Supplementary file 4 [file aging-05-130-s004.xlsx]

## Sheet: Supplemental Table 4
Supplementary Table 4. Age diseases associated with circulating miRNAs whose serum levels are increased with age and decreased by CR.
ACTH-Secreting Pituitary Adenoma
Acute Coronary Syndrome
Acute graft-versus-host disease
Acute Liver Injury
acute lymphoblastic leukemia (ALL)
acute myeloid leukemia (AML)
acute promyelocytic leukemia (APL)
Adenocarcinoma
Adrenocortical Carcinoma
alcoholic liver disease (ALD)
Alopecia
Alzheimer's disease
Amyloidosis
anaplastic thyroid carcinoma (ATC)
anxiety disorder
Arthritis, Psoriatic
Arthritis, Rheumatoid
Asthma
Astrocytoma
Atherosclerosis
Atrial Fibrillation
Autoimmune Diseases
B-cell chronic lymphocytic leukemia
Barrett Esophagus
bladder cancer
Bladder Neoplasms
Brain Neoplasms
breast cancer
Breast Neoplasms
Burkitt Lymphoma
Carcinoma
Carcinoma, Basal Cell
Carcinoma, Ehrlich Tumor
Carcinoma, Hepatocellular
Carcinoma, Non-Small-Cell Lung
Carcinoma, Oral
Carcinoma, Renal Cell
Carcinoma, Squamous Cell
cardiac hypertrophy
Cardiomyopathy, Dilated
Central Nervous System Diseases
chronic lymphocytic leukemia (CLL)
chronic myeloid leukemia (CML)
chronic pancreatitis
Colitis
Colitis, Ulcerative
Colonic Neoplasms
colorectal cancer
Coronary Artery Disease
Crohn Disease
Cystic Fibrosis
Dementia
Demyelination
dermatomyositis (DM)
Diabetes Mellitus, Type 2
Diabetic Nephropathies
diffuse large B-cell lymphoma (DLBCL)
Duchenne muscular dystrophy (DMD)
Eczema
Encephalomyelitis, Autoimmune, Experimental
Endometrial Neoplasms
endometriosis
Eosinophilic Esophagitis
Ependymoma
epithelial ovarian cancer (EOC)
esophageal cancer
Esophageal Neoplasms
facioscapulohumeral muscular dystrophy (FSHD)
Fatty Liver
Fibrodysplasia ossificans progressiva
Fibrosis
follicular lymphoma (FL)
Gastric Neoplasms
Gastritis, Atrophic
Gerstmann-Straussler-Scheinker (GSS) Syndrome
Glioblastoma
glioblastoma multiforme (GBM)
glioma
Glomerulonephritis, IGA
Graves' Disease
Hand-Foot-and-Mouth Disease
Head and Neck Neoplasms
head and neck squamous cell carcinoma (HNSCC)
Heart Failure
Hepatitis B
Hepatitis C
Hepatoblastoma
hepatocellular carcinoma (HCC)
HIV Infections
Hodgkin Disease
Hodgkin's lymphoma
homozygous sickle cell disease (HbSS)
Huntington Disease
Hyperlipidemia
Hypertension
Hypertrophy
Inclusion body myositis (IBM)
Infertility, Male
Inflammation
Interstitial Fibrosis
Intervertebral Disk
Ischemia
Kidney Neoplasms
Laryngeal Neoplasms
Leukemia
Leukemia-Lymphoma, Adult T-Cell
Leukemia, Adult T-Cell
Leukemia, B-Cell
Leukemia, Biphenotypic, Acute
Leukemia, lymphoblastic
Leukemia, lymphoblastic, Chronic
Leukemia, Lymphocytic, Chronic, B-Cell
Leukemia, Myelogenous, Chronic
Leukemia, Myelogenous, Chronic, BCR-ABL Positive
Leukemia, Myeloid, Acute
Leukemia, Myeloid, Chronic
Leukemia, Myeloid, Chronic-Phase
limb-girdle muscular dystrophies types 2A (LGMD2A)
Lipid Metabolism Disorders
Liposarcoma
Liver Diseases, Alcoholic
Liver Failure
Liver Injury
Liver Neoplasms
Lung Neoplasms
Lupus Erythematosus, Systemic
lupus nephritis
Lupus Vulgaris
Lymphoma
Lymphoma, B-Cell
Lymphoma, Extranodal NK-T-Cell
Lymphoma, Large B-Cell, Diffuse
Lymphoma, Large-Cell, Anaplastic
malignant melanoma
Malignant mesothelioma (MM)
Medulloblastoma
Melanoma
miyoshi myopathy (MM)
Moyamoya
Multiple Myeloma
Multiple Sclerosis
Muscular Dystrophies
Mycosis Fungoides
Myelodysplastic Syndromes
Myeloproliferative Disorders
Myocardial Ischemia
Nasopharyngeal Neoplasms
nemaline myopathy (NM)
Nephrosclerosis
Nerve Injury
Neuroblastoma
Neurodegenerative Diseases
non-alcoholic fatty liver disease (NAFLD)
Non-Hodgkin Lymphoma
Ocular Behcet's Disease
Oral Lichen Planus
Oral Squamous Cell Carcinoma (OSCC)
Osteoarthritis
Osteosarcoma
Ovarian Neoplasms
pancreatic cancer
pancreatic ductal adenocarcinoma (PDAC)
Pancreatic Neoplasms
papillary thyroid carcinoma (PTC)
Parkinson Disease
Patau Syndrome
Periodontal Diseases
Pheochromocytoma
Pituitary Neoplasms
Polycystic Kidney Diseases
Polycythemia Vera
polymyositis (PM)
Pre-Eclampsia
Precursor B-Cell Lymphoblastic Leukemia-Lymphoma
Precursor Cell Lymphoblastic Leukemia-Lymphoma
primary biliary cirrhosis (PBC)
Prion Diseases
Prostatic Neoplasms
psoriasis
Pulmonary Embolism
Pulmonary Neuroendocrine (NE) Tumor
Renal Insufficiency
Reperfusion Injury
Retinal Degeneration
retinitis pigmentosa (RP)
Retinoblastoma
Salivary Gland Neoplasms
Sarcoma, Synovial
schizophrenia
Scleroderma, Systemic
Sepsis
serous ovarian cancer
Sjogren's Syndrome
Spinal Cord Injuries
Stroke
Thyroid Neoplasms
Urinary Bladder Neoplasms
Uterine Cervical Neoplasms
Uterine Leiomyoma
vascular disease
Waldenstrom Macroglobulinemia
